# Supplementary material for: Augmentation of progestin signaling rescues testis organization and spermatogenesis in zebrafish with the depletion of androgen signaling
Source: eLife. 2022 Feb 28;11:e66118. doi: 10.7554/eLife.66118 (PMC8912926; doi:10.7554/eLife.66118)
Supplement: Figure 1—source data 1. [file elife-66118-fig1-data1.xlsx]

## Sheet: Figure 1E
Con	ar-/-	cyp17a1-/-	cyp17a1-/-;ar-/-
0.524	0.413	2.214	3.72
0.95	0.353	2.901	1.53
0.605	0.468	2.212	2.711
0.784	0.435	1.733	2.577
0.71	0.619	2.939	2.019
0.956	0.339	1.635	2.016
0.549	0.381
	0.204

## Sheet: Figure 1J
Con	ar-/-	cyp17a1-/-	cyp17a1-/-;ar-/-
340	92	725	1004
374	33	636	1656
294	67	691	1720
394	24	588	1328
972	20	1353	876
648	16	703
862	19	497
246		1431
		1974
