# Supplementary material for: Augmentation of progestin signaling rescues testis organization and spermatogenesis in zebrafish with the depletion of androgen signaling
Source: eLife. 2022 Feb 28;11:e66118. doi: 10.7554/eLife.66118 (PMC8912926; doi:10.7554/eLife.66118)
Supplement: Figure 2—figure supplement 1—source data 1. [file elife-66118-fig2-figsupp1-data1.xlsx]

## Sheet: Figure 2-figure supplement 1A
Con	cyp17a1-/-
8.08765	0.438789
5.5549	0.334594
5.43139	0.649867
4.31153	0.536843
2.90521	0.683332
2.65212	1.88343
	1.67285
	0.516245
	0.526817

## Sheet: Figure 2-figure supplement 1B
Con	cyp17a1-/-
23.7794	0.295276
31.3157	0.285894
34.8175	0.619311
40.907	1.11952
33.4012	0.857804
	0.453874
	0.185357
