# Supplementary material for: Augmentation of progestin signaling rescues testis organization and spermatogenesis in zebrafish with the depletion of androgen signaling
Source: eLife. 2022 Feb 28;11:e66118. doi: 10.7554/eLife.66118 (PMC8912926; doi:10.7554/eLife.66118)
Supplement: Figure 2—figure supplement 2—source data 1. [file elife-66118-fig2-figsupp2-data1.xlsx]

## Sheet: Figure 2-figure supplement 2A
Con	ar-/-
235.639	204.178
185.655	308.737
476.151	453.39
245.286	167.825
215.321	506.447
261.177	167.653
160.945	220.911
198.38	444.591
192.779	218.843

## Sheet: Figure 2-figure supplement 2B
Con	ar-/-
97.0357	53.3792
90.0655	287.238
80.609	73.0357
194.925	246.971
227.919	260.472
93.3609	334.098
58.3872	41.8401
103.371	261.613
185.446	64.2118

## Sheet: Figure 2-figure supplement 2C
Con	ar-/-
56.056	149.507
25.158	84.3549
209.109	37.8969
395.219	36.6998
33.3592	76.0502
88.2102	327.368
56.867	410.568
238.739	30.3144
326.119	31.2616
