# Supplementary material for: Augmentation of progestin signaling rescues testis organization and spermatogenesis in zebrafish with the depletion of androgen signaling
Source: eLife. 2022 Feb 28;11:e66118. doi: 10.7554/eLife.66118 (PMC8912926; doi:10.7554/eLife.66118)
Supplement: Figure 2—source data 1. [file elife-66118-fig2-data1.xlsx]

## Sheet: Figure 2A
	3 mpf		3.5 mpf		4 mpf
	Con	cyp17a1-/-	Con	cyp17a1-/-	Con	cyp17a1-/-
11-KT (pg/g)	260.682	17.8349	123.341	48	559.952	21.7639
	101.234	16.052	152.646	43.1091	519.669	23.3316
	121.724	0.155975	278.942	48.8604	484.187	18.403
	133.852	13.0592	132.66	35.882	472.668	25.4749
	251.598	Not detected	131.21	46.5176	725.476	25.1654
	101.561	Not detected	97.014	64.7279	816.133	27.4843

## Sheet: Figure 2B
	3 mpf		3.5 mpf		4 mpf
	Con	cyp17a1-/-	Con	cyp17a1-/-	Con	cyp17a1-/-
DHP (pg/g)	294.674	1900.7	318.695	3995.67	186.021	1938.75
	197.102	1136.19	274.443	1122.78	421.352	767.055
	129.54	3365.47	513.039	4209.78	211.102	1145.41
	69.9192	2512.41	894.731	2656.83	455.856	301.748
	57.5161	1664.09	482.097	1885.6	581.072	1319.19
	249.36	1673.48	326.024	886.776	286.321	530.334

## Sheet: Figure 2C
	3 mpf		3.5 mpf		4 mpf
	Con	cyp17a1-/-	Con	cyp17a1-/-	Con	cyp17a1-/-
P4 (pg/g)	141.566	117.788	199.874	226.013	122.323	289.647
	142.193	125.522	195.234	258.461	196.333	195.041
	109.927	262.476	123.879	181.13	194.863	195.793
	105.227	173.576	154.31	237.842	183.99	230.452
	133.775	227.147	179.348	298.792	168.439	228.418
	154.324	250.288	163.485	232.131	179.664	218.216
