# Supplementary material for: Augmentation of progestin signaling rescues testis organization and spermatogenesis in zebrafish with the depletion of androgen signaling
Source: eLife. 2022 Feb 28;11:e66118. doi: 10.7554/eLife.66118 (PMC8912926; doi:10.7554/eLife.66118)
Supplement: Figure 3—figure supplement 1—source data 1. [file elife-66118-fig3-figsupp1-data1.xlsx]

## Sheet: Figure 3-figure supplement 1
ar+/+ male + DHP	ar-/- male + DHP	ar+/+ male + system water
2/89 (2.25%)	2/91 (2.2%)	150/221 (67.87%)
2/90 (2.22%)	3/82 (3.66%)	206/379 (54.35%)
3/71 (4.23%)	0/122 (0%)	122/188 (64.89%)
6/150 (4%)	3/133 (2.26%)
2/239 (0.84%)	0/156 (0%)
0/40 (0%)	15/178 (8.43%)
