# Supplementary material for: Augmentation of progestin signaling rescues testis organization and spermatogenesis in zebrafish with the depletion of androgen signaling
Source: eLife. 2022 Feb 28;11:e66118. doi: 10.7554/eLife.66118 (PMC8912926; doi:10.7554/eLife.66118)
Supplement: Figure 3—source data 1. [file elife-66118-fig3-data1.xlsx]

## Sheet: Figure 3E
ar+/+	ar-/-	ar+/+ + DHP	ar-/- + DHP
0.806	0.1907	0.9228	0.6388
1.0009	0.2664	0.89	0.4675
0.7172	0.2686	1.069	0.839
0.778	0.084	0.838	0.825
1.075	0.183	0.704	0.92
0.907	0.221	0.87
	0.22	0.743
	0.262	0.654
	0.196

## Sheet: Figure 3J
ar+/+	ar-/-	ar+/+ + DHP	ar-/- + DHP
536	23	355	239
566	10	492	149
461	36	207	178
364	21	154	78
264	79	533	205
359	79	510	132
231	32		129
928	55		293
525	35		218
697	48		250
267	84		132
	62		119
	48
	25

## Sheet: Figure 3K
ar-/- male	ar-/- male + DHP
120.537	1069.97
81.0988	158.572
241.265	319.663
234.857	480.873
152.746	864.932
