# Supplementary material for: Augmentation of progestin signaling rescues testis organization and spermatogenesis in zebrafish with the depletion of androgen signaling
Source: eLife. 2022 Feb 28;11:e66118. doi: 10.7554/eLife.66118 (PMC8912926; doi:10.7554/eLife.66118)
Supplement: Figure 4—source data 1. [file elife-66118-fig4-data1.xlsx]

## Sheet: Figure 4I
Con	ar-/-	cyp17a1-/-	npgr-/-	cyp17a1-/-;ar-/-	cyp17a1-/-;npgr-/-	ar-/-;npgr-/-	cyp17a1-/-;ar-/-;npgr-/-
0.514286	0.08133	3.25814	0.657318	2.98748	0.964187	0.100806	0.533981
0.535783	0.194175	2.33359	1.72468	2.87141	0.984252	0.165746	0.652377
0.811456	0.099828	2.39352	0.567644	1.2318	0.660377	0.1223	0.583333
0.6284	0.258398	1.86683	0.521574	2.47268	0.619195	0.1324	0.641026
0.683654	0.19274	4.18666	0.951848	1.1276	0.198807
0.418251	0.078055	1.68196	1.60772	1.13852	0.996678
0.366077	0.224048	1.03397	0.524017	2.31696	0.7581
0.575816	0.07725	3.79225	0.763702	1.5625	0.8302
0.50813	0.052882	1.23882	0.927767	1.35777
0.459559	0.078927	2.85871	1.02828	2.5198
0.457666	0.072569	1.34409	0.753864	3.37143
0.439668	0.162162	1.39198	0.717949	3.15259
0.558436	0.061087	1.55777	0.425015	3.41649
0.78125	0.199601		0.564175
1.21951	0.105652
0.613732
0.861141
0.87841

## Sheet: Figure 4R
Con	ar-/-	cyp17a1-/-	npgr-/-	cyp17a1-/-;ar-/-	cyp17a1-/-;npgr-/-	ar-/-;npgr-/-	cyp17a1-/-;ar-/-;npgr-/-
303	33	541	141	357	198	52	54
194	26	990	446	481	143	21	64
150	54	445	407	689	170	40	35
119	28	491	425	341	105	69	50
163	10	530	239	645	68	59	62
141	57	659	403	713	101	68	31
233	66	491	320	714	310	15	116
201	62	769	274	318	641	16	96
215	19	488	437	465	422		101
117	15	438	288	537	143		43
361	25	601	178	318	90		57
364	30	1010	228	571	95		58
343	27	553	178	423	147		44
317	32	441	135	423	143		32
239	23	935	175	425			71
342	24	432	202	218			39
270	22	789	188	203			27
365	35	358	312	215			44
261		457	121	303			44
215		705	127	139			48
785		821	64	498
271			82	299
194				650
270				481
214				490
222				1491
142				857
176				713
327				339
				618
				359
				491
				491
				610
				472
