# Supplementary material for: Augmentation of progestin signaling rescues testis organization and spermatogenesis in zebrafish with the depletion of androgen signaling
Source: eLife. 2022 Feb 28;11:e66118. doi: 10.7554/eLife.66118 (PMC8912926; doi:10.7554/eLife.66118)
Supplement: Figure 6—figure supplement 2—source data 1. [file elife-66118-fig6-figsupp2-data1.xlsx]

## Sheet: Figure 1-figure supplement 1A
Con	cyp17a1-/-
8.08765	0.438789
5.5549	0.334594
5.43139	0.649867
4.31153	0.536843
2.90521	0.683332
2.65212	1.88343
	1.67285
	0.516245
	0.526817

## Sheet: Figure 1-figure supplement 1B
Con	cyp17a1-/-
23.7794	0.295276
31.3157	0.285894
34.8175	0.619311
40.907	1.11952
33.4012	0.857804
	0.453874
	0.185357

## Sheet: Figure 6-figure supplement 2F
Con	ar-/-	cyp17a1-/-	cyp17a1-/-;ar-/-	cyp17a1-/-;ar-/-;fshb-/-
0.6523	0.1431	1.9826	2.599	0.9779
0.3541	0.211	2.0961	2.8537	0.8
0.9244	0.2744	1.8891	1.9169
0.6042	0.2155	1.9223
0.463	0.1136	2.6907
0.7467	0.3438	1.9221
1.2277	0.0793
0.4608	0.0843
0.7706	0.3344
0.871
0.8046
