# Supplementary material for: Augmentation of progestin signaling rescues testis organization and spermatogenesis in zebrafish with the depletion of androgen signaling
Source: eLife. 2022 Feb 28;11:e66118. doi: 10.7554/eLife.66118 (PMC8912926; doi:10.7554/eLife.66118)
Supplement: Figure 6—figure supplement 3—source data 1. [file elife-66118-fig6-figsupp3-data1.xlsx]

## Sheet: Figure 6-figure supplement 3
Con			cyp17a1-/-			ar-/-			npgr-/-			cyp17a1-/-;ar-/-			cyp17a1-/-;npgr-/-			ar-/-;npgr-/-			cyp17a1-/-;ar-/-;npgr-/-
1.25374	1.03976	0.706501	76.8034	77.4356	80.1486	6.93752	7.62373	7.48332	1.46101	1.22693	1.50998	23.6658	24.8916	25.9915	8.21991	13.9307	14.0961	0.917663	1.30968	1.33518	61.8044	67.8952	71.0462
