# Supplementary material for: Augmentation of progestin signaling rescues testis organization and spermatogenesis in zebrafish with the depletion of androgen signaling
Source: eLife. 2022 Feb 28;11:e66118. doi: 10.7554/eLife.66118 (PMC8912926; doi:10.7554/eLife.66118)
Supplement: Figure 6—source data 1. [file elife-66118-fig6-data1.xlsx]

## Sheet: Figure 6E
Con			cyp17a1-/-			ar-/-			npgr-/-			cyp17a1-/-;ar-/-			cyp17a1-/-;npgr-/-			ar-/-;npgr-/-			cyp17a1-/-;ar-/-;npgr-/-
0.992614	0.999546	1.00784	0.962337	0.939957	0.931641	3.03958	3.138	2.80566	2.60786	2.67771	2.72512	1.35846	1.36906	1.34407	7.58395	7.64348	7.54458	3.79152	4.21414	4.27637	2.25768	2.39117	2.47036

## Sheet: Figure 6F
Con			cyp17a1-/-			ar-/-			npgr-/-			cyp17a1-/-;ar-/-			cyp17a1-/-;npgr-/-			ar-/-;npgr-/-			cyp17a1-/-;ar-/-;npgr-/-
0.99111	1.02161	0.987282	5.71976	6.24157	6.00726	0.0400455	0.0425972	0.0434059	2.09495	2.09023	2.02308	3.46091	4.11223	3.83395	1.30522	1.3815	1.33659	0.00187032	0.00193849	0.00206799	0.00171456	0.0017095	0.00168348

## Sheet: Figure 6G
Con			cyp17a1-/-			ar-/-			npgr-/-			cyp17a1-/-;ar-/-			cyp17a1-/-;npgr-/-			ar-/-;npgr-/-			cyp17a1-/-;ar-/-;npgr-/-
1.00016	0.999148	1.00069	1.31839	0.737944	1.30017	0.0089811	0.00725524	0.00820998	0.860039	0.905204	0.88577	0.273279	0.249568	0.27583	0.146296	0.129463	0.130603	0.0254225	0.0390231	0.0307327	0.251129	0.265869	0.250031

## Sheet: Figure 6H
Con			cyp17a1-/-			ar-/-			npgr-/-			cyp17a1-/-;ar-/-			cyp17a1-/-;npgr-/-			ar-/-;npgr-/-			cyp17a1-/-;ar-/-;npgr-/-
0.977469	1.02331	0.999224	1.84138	1.80366	1.86526	3.27198	3.36468	3.30465	0.793102	0.831372	0.838432	1.5845	1.64816	1.64927	1.1568	1.19192	1.17946	3.37805	3.90369	3.94614	2.6486	3.13153	3.09772

## Sheet: Figure 6I
Con			cyp17a1-/-			ar-/-			npgr-/-			cyp17a1-/-;ar-/-			cyp17a1-/-;npgr-/-			ar-/-;npgr-/-			cyp17a1-/-;ar-/-;npgr-/-
0.970068	1.03298	0.996949	0.375041	0.388424	0.386395	1.78644	1.88065	1.8608	0.853021	0.872524	0.899195	1.72016	1.81329	1.701	0.769573	0.823553	0.791371	1.22169	1.19361	1.14774	2.30005	2.32129	2.3579
